# Supplementary material for: Polymorphisms in RAS/RAF/MEK/ERK Pathway Are Associated with Gastric Cancer
Source: MDPI journal article supplement (doi:10.3390/genes10010020), 2018-12-28
Supplement: s1 [file s1]

**Table S4.** Proxy SNPs of associated variants and their functional annotation.

| rs_ID             | HGSV                            | Intron     | Alleles (Major/minor) | MAF [1] | Distance (bases) | D'   | r <sup>2</sup> | Correlated alleles  | RegulomeDB | enhancer histone marks | promoter histone marks | DNase hypersensitive sites | ChIP-Seq (bound proteins) | eQTL |
|-------------------|---------------------------------|------------|-----------------------|---------|------------------|------|----------------|---------------------|------------|------------------------|------------------------|----------------------------|---------------------------|------|
| <b>rs3729931</b>  |                                 |            |                       |         |                  |      |                |                     |            |                        |                        |                            |                           |      |
| rs3729931         | NM_002880.3:c.1669-36C>T        | 15/16      | (G/A)                 | 0.47    | 0                | 1.00 | 1.00           | G=G,A=A             | 1f         | 3                      | 0                      | 1                          | 1                         | YES  |
| <b>rs45604736</b> |                                 |            |                       |         |                  |      |                |                     |            |                        |                        |                            |                           |      |
| rs45604736        | -                               | Upstream   | (A/G)                 | 0.12    | 0                | 1.00 | 1.00           | A=A,G=G             | 2b         | 18                     | 18                     | 15                         | 3                         | NO   |
| rs117957959       | -                               | Upstream   | (C/T)                 | 0.13    | 5825             | 1.00 | 0.97           | A=C,G=T             | 5          |                        |                        |                            |                           | NO   |
| rs41258054        | NM_176795.4:c.111+15G>A         | 2/5        | (C/T)                 | 0.14    | -2280            | 1.00 | 0.88           | A=C,G=T             | 5          |                        |                        |                            |                           | NO   |
| rs146436269       | -                               | Upstream   | (T/G)                 | 0.14    | 6905             | 1.00 | 0.86           | A=T,G=G             | 6          |                        |                        |                            |                           | NO   |
| <b>rs2283792</b>  |                                 |            |                       |         |                  |      |                |                     |            |                        |                        |                            |                           |      |
| rs2283792         | NM_002745.4:c.857-3854A>C       | 6/8        | (T/G)                 | 0.38    | 0                | 1.00 | 1.00           | T=T,G=G             | 4          |                        |                        |                            |                           | YES  |
| rs11267198        | NM_002745.4:c.120-2529_120-2528 | 1/8        | (-/CATTAAAAAGAAA)     | 0.38    | 33538            | 1.00 | 0.99           | T=-,G=CATTAAAAAGAAA | 7          |                        |                        |                            |                           | NO   |
| rs11704205        | NM_002745.4:c.610-2156A>G       | 4/8        | (T/C)                 | 0.38    | 14128            | 1.00 | 0.99           | T=T,G=C             | 7          |                        |                        |                            |                           | YES  |
| rs13943           | NM_002745.4:c.*2337G>C          | 3' UTR     | (C/G)                 | 0.38    | -14923           | 1.00 | 0.99           | T=C,G=G             | 5          |                        |                        |                            |                           | YES  |
| rs2266967         | NM_002745.4:c.492+3350G>T       | 3/8        | (C/A)                 | 0.38    | 25664            | 1.00 | 0.99           | T=C,G=A             | 5          |                        |                        |                            |                           | YES  |
| rs4478016         | NM_002745.4:c.609+4570A>G       | 4/8        | (T/C)                 | 0.38    | 17606            | 1.00 | 0.99           | T=T,G=C             | 7          |                        |                        |                            |                           | YES  |
| rs5749806         | intergenic                      | intergenic | (C/A)                 | 0.38    | -24507           | 1.00 | 0.99           | T=C,G=A             | 5          |                        |                        |                            |                           | YES  |
| rs5749986         | NM_002745.4:c.492+2478A>G       | 3/8        | (T/C)                 | 0.38    | 26536            | 1.00 | 0.99           | T=T,G=C             | 5          |                        |                        |                            |                           | YES  |
| rs5999521         | NM_002745.4:c.610-3302T>C       | 4/8        | (A/G)                 | 0.38    | 15274            | 1.00 | 0.99           | T=A,G=G             | 2b         | 9                      | 1                      | 5                          | 14                        | YES  |
| rs5999550         | NM_002745.4:c.609+2015G>C       | 4/8        | (C/G)                 | 0.38    | 20161            | 1.00 | 0.99           | T=C,G=G             | 4          |                        |                        |                            |                           | YES  |
| rs8136590         | NM_002745.4:c.609+4158A>G       | 4/8        | (T/C)                 | 0.38    | 18018            | 1.00 | 0.99           | T=T,G=C             | 7          |                        |                        |                            |                           | YES  |
| rs3810609         | downstream                      | downstream | (C/T)                 | 0.38    | -18323           | 0.99 | 0.99           | T=C,G=T             | 4          |                        |                        |                            |                           | YES  |
| rs3810610         | NM_002745.4:c.*3041A>G          | 3' UTR     | (T/C)                 | 0.38    | -15627           | 0.99 | 0.99           | T=T,G=C             | 4          |                        |                        |                            |                           | YES  |
| rs1892846         | NM_002745.4:c.120-24344T>G      | 1/8        | (A/C)                 | 0.38    | 55354            | 1.00 | 0.99           | T=A,G=C             | 5          |                        |                        |                            |                           | YES  |
| rs1892848         | NM_002745.4:c.120-24427A>G      | 1/8        | (T/C)                 | 0.38    | 55437            | 1.00 | 0.99           | T=T,G=C             | 5          |                        |                        |                            |                           | YES  |
| rs2283794         | NM_002745.4:c.119+9142A>T       | 1/8        | (T/C)                 | 0.38    | 81344            | 1.00 | 0.99           | T=T,G=C             | 4          |                        |                        |                            |                           | YES  |
| rs5749937         | NM_002745.4:c.856+2410G>A       | 6/8        | (C/T)                 | 0.38    | 9011             | 1.00 | 0.99           | T=C,G=T             | 6          |                        |                        |                            |                           | YES  |

| rs_ID            | HGSV                            | Intron     | Alleles (Major/minor) | MAF [1] | Distance (bases) | D'   | r <sup>2</sup> | Correlated alleles | RegulomeDB | enhancer histone marks | promoter histone marks | DNase hypersensitive sites | ChIP-Seq (bound proteins) | eQTL |
|------------------|---------------------------------|------------|-----------------------|---------|------------------|------|----------------|--------------------|------------|------------------------|------------------------|----------------------------|---------------------------|------|
| rs5999750        | NM_002745.4:c.120-25874A>G      | 1/8        | (T/C)                 | 0.38    | 56884            | 1.00 | 0.99           | T=T,G=C            | 6          |                        |                        |                            |                           | YES  |
| rs5999823        | NM_002745.4:c.119+10735G>T      | 1/8        | (C/A)                 | 0.38    | 79751            | 1.00 | 0.99           | T=C,G=A            | 6          |                        |                        |                            |                           | NO   |
| rs6518986        | NM_002745.4:c.120-23212A>G      | 1/8        | (T/C)                 | 0.38    | 54222            | 1.00 | 0.99           | T=T,G=C            | 5          |                        |                        |                            |                           | YES  |
| rs5750113        | NM_002745.4:c.119+1538G>A       | 1/8        | (C/T)                 | 0.38    | 88949            | 1.00 | 0.98           | T=C,G=T            | 4          |                        |                        |                            |                           | YES  |
| rs5999515        | NM_002745.4:c.610-2004A>G       | 4/8        | (T/C)                 | 0.38    | 13976            | 1.00 | 0.97           | T=T,G=C            | 6          |                        |                        |                            |                           | YES  |
| rs8141851        | NM_002745.4:c.120-4315T>C       | 1/8        | (A/G)                 | 0.38    | 35325            | 1.00 | 0.97           | T=A,G=G            | 5          |                        |                        |                            |                           | YES  |
| rs8136867        | NM_002745.4:c.119+16818C>T      | 1/8        | (G/A)                 | 0.37    | 73668            | 1.00 | 0.93           | T=G,G=A            | 5          |                        |                        |                            |                           | YES  |
| rs5755654        | NM_002745.4:c.119+29134T>C      | 1/8        | (A/G)                 | 0.37    | 61352            | 1.00 | 0.93           | T=A,G=G            | 3a         |                        |                        |                            |                           | YES  |
| rs5755099        | NM_002745.4:c.967-1431T>G       | 7/8        | (A/C)                 | 0.40    | -6085            | 1.00 | 0.92           | T=A,G=C            | 5          |                        |                        |                            |                           | YES  |
| rs6928           | NM_002745.4:c.*3535G>C          | 3' UTR     | (C/G)                 | 0.40    | -16121           | 0.99 | 0.91           | T=C,G=G            | 4          |                        |                        |                            |                           | YES  |
| rs113244990      | NM_002745.4:c.119+27940_119+279 | 1/8        | (-/AAAC)              | 0.36    | 62542            | 1.00 | 0.91           | T=-,G=AAAC         | 5          |                        |                        |                            |                           | NO   |
| rs11440648       | intergenic                      | intergenic | (-/T)                 | 0.39    | 99755            | 0.96 | 0.91           | T=-,G=T            | 4          |                        |                        |                            |                           | YES  |
| rs9607347        | intergenic                      | intergenic | (T/C)                 | 0.39    | 96323            | 0.96 | 0.91           | T=T,G=C            | 7          |                        |                        |                            |                           | YES  |
| rs5754941        | intergenic                      | intergenic | (C/G)                 | 0.36    | -29130           | 0.99 | 0.87           | T=C,G=G            | 7          |                        |                        |                            |                           | YES  |
| rs743409         | NM_002745.4:c.857-1944T>C       | 6/8        | (A/G)                 | 0.34    | -1910            | 1.00 | 0.84           | T=A,G=G            | 4          |                        |                        |                            |                           | YES  |
| rs3788332        | NM_002745.4:c.120-9432C>T       | 1/8        | (G/A)                 | 0.43    | 40442            | 0.99 | 0.83           | T=G,G=A            | 2b         | 21                     | 10                     | 19                         | 12                        | YES  |
| rs4516540        | NM_002745.4:c.120-6111T>C       | 1/8        | (A/G)                 | 0.43    | 37121            | 0.99 | 0.83           | T=A,G=G            | 5          |                        |                        |                            |                           | YES  |
| rs5749998        | NM_002745.4:c.120-239T>A        | 1/8        | (A/T)                 | 0.43    | 31249            | 0.99 | 0.83           | T=A,G=T            | 5          |                        |                        |                            |                           | YES  |
| rs9607287        | NM_002745.4:c.120-1290T>C       | 1/8        | (A/G)                 | 0.43    | 32300            | 0.99 | 0.83           | T=A,G=G            | 7          |                        |                        |                            |                           | YES  |
| rs2006893        | NM_002745.4:c.857-1407C>T       | 6/8        | (G/A)                 | 0.43    | -2447            | 1.00 | 0.83           | T=G,G=A            | 4          |                        |                        |                            |                           | YES  |
| <b>rs9610417</b> |                                 |            |                       |         |                  |      |                |                    |            |                        |                        |                            |                           |      |
| rs9610417        | NM_002745.4:c.119+21641G>A      | 1/8        | (C/T)                 | 0.18    | 0                | 1.00 | 1.00           | C=C,T=T            | 5          |                        |                        |                            |                           | YES  |
| rs9610386        | NM_002745.4:c.120-28740G>A      | 1/8        | (C/T)                 | 0.18    | -9095            | 1.00 | 1.00           | C=C,T=T            | 6          |                        |                        |                            |                           | YES  |
| rs2070505        | NM_002745.4:c.120-122C>G        | 1/8        | (G/C)                 | 0.18    | -37713           | 1.00 | 0.99           | C=G,T=C            | 4          |                        |                        |                            |                           | YES  |
| rs9607272        | NM_002745.4:c.856+6148A>C       | 6/8        | (T/G)                 | 0.18    | -63572           | 1.00 | 0.99           | C=T,T=G            | 1f         | 2                      | 0                      | 6                          | 1                         | YES  |
| rs9610496        | NM_002745.4:c.119+2163T>A       | 1/8        | (A/T)                 | 0.18    | 19479            | 1.00 | 0.99           | C=A,T=T            | 2b         | 14                     | 18                     | 48                         | 14                        | YES  |

| rs_ID       | HGSV                       | Intron     | Alleles (Major/minor) | MAF [1] | Distance (bases) | D'   | r <sup>2</sup> | Correlated alleles | RegulomeDB | enhancer histone marks | promoter histone marks | DNase hypersensitive sites | ChIP-Seq (bound proteins) | eQTL |
|-------------|----------------------------|------------|-----------------------|---------|------------------|------|----------------|--------------------|------------|------------------------|------------------------|----------------------------|---------------------------|------|
| rs3810608   | -                          | Downstream | (G/A)                 | 0.18    | -87176           | 1.00 | 0.99           | C=G,T=A            | 4          |                        |                        |                            |                           | YES  |
| rs61763392  | NM_002745.4:c.856+651A>G   | 6/8        | (T/C)                 | 0.18    | -58075           | 1.00 | 0.98           | C=T,T=C            | 6          |                        |                        |                            |                           | YES  |
| rs3810606   | -                          | Downstream | (A/G)                 | 0.18    | -88662           | 0.99 | 0.98           | C=A,T=G            | 4          |                        |                        |                            |                           | YES  |
| rs6518951   | NM_002745.4:c.966+589A>G   | 7/8        | (T/C)                 | 0.18    | -73397           | 0.99 | 0.98           | C=T,T=C            | 5          |                        |                        |                            |                           | YES  |
| rs111665812 | NM_002745.4:c.609+4133G>A  | 4/8        | (C/T)                 | 0.19    | -50802           | 1.00 | 0.94           | C=C,T=T            | 7          |                        |                        |                            |                           | YES  |
| rs113709132 | NM_002745.4:c.120-2714G>A  | 1/8        | (C/T)                 | 0.19    | -35121           | 1.00 | 0.94           | C=C,T=T            | 5          |                        |                        |                            |                           | YES  |
| rs28803281  | NM_002745.4:c.609+4777G>A  | 4/8        | (C/T)                 | 0.19    | -51446           | 1.00 | 0.94           | C=C,T=T            | 7          |                        |                        |                            |                           | NO   |
| rs75681740  | NM_002745.4:c.119+4656T>A  | 1/8        | (A/T)                 | 0.19    | 16986            | 1.00 | 0.94           | C=A,T=T            | 5          |                        |                        |                            |                           | NO   |
| rs9610470   | NM_002745.4:c.119+12472A>G | 1/8        | (T/C)                 | 0.19    | 9169             | 1.00 | 0.94           | C=T,T=C            | 1f         | 12                     | 0                      | 2                          | 0                         | YES  |
| rs143334716 | NM_002745.4:c.119+19191dup | 1/8        | (-/C)                 | 0.19    | 2449             | 1.00 | 0.93           | C=-,T=C            | 3a         |                        |                        |                            |                           | YES  |
| rs62235142  | NM_002745.4:c.610-1966C>T  | 4/8        | (G/C)                 | 0.19    | -54907           | 1.00 | 0.93           | C=G,T=C            | 7          |                        |                        |                            |                           | YES  |
| rs62235144  | NM_002745.4:c.120-14383G>T | 1/8        | (C/A)                 | 0.19    | -23452           | 1.00 | 0.93           | C=C,T=A            | 7          |                        |                        |                            |                           | YES  |
| rs9610446   | NM_002745.4:c.119+18003T>G | 1/8        | (A/C)                 | 0.19    | 3638             | 1.00 | 0.93           | C=A,T=C            | 5          |                        |                        |                            |                           | NO   |
| rs9610487   | NM_002745.4:c.119+7642A>G  | 1/8        | (T/C)                 | 0.19    | 13999            | 1.00 | 0.93           | C=T,T=C            | 1d         | 13                     | 1                      | 8                          | 1                         | YES  |
| rs9610504   | NM_002745.4:c.119+82C>T    | 1/8        | (G/A)                 | 0.18    | 21560            | 0.97 | 0.90           | C=G,T=A            | 2b         | 0                      | 24                     | 38                         | 16                        | YES  |
| rs71735050  | -                          | Downstream | (TGTT/-)              | 0.18    | 26741            | 0.94 | 0.87           | C=TGTT,T=-         | -          |                        |                        |                            |                           | YES  |

HGSV: Human Genome Variation Society nomenclature, MAF: minor allele frequency, eQTL: expression Quantitative Trait Loci, ChIP-Seq: Chromatin Immunoprecipitation Sequencing.

[1]: 1000 Genomes Project Phase 3 (Version5), Ad Mixed American (AMR) population.

[illegible]

| RS_Number        | HGSV                                            | Intron     | Alleles (Major/minor) | MAF   | Distance (bases) | D'    | R2    | Correlated_Alleles  | RegulomeDB |
|------------------|-------------------------------------------------|------------|-----------------------|-------|------------------|-------|-------|---------------------|------------|
| rs2283792        | NM_002745.4:c.857-3854A>C                       | 6/8        | (T/G)                 | 0.385 | 0                | 1     | 1     | T=T,G=G             | 4          |
| rs11267198       | NM_002745.4:c.120-2529_120-2528insTTTCTTTTAAATG | 1/8        | (-/CATTA              | 0.383 | 33538            | 1     | 0.994 | T=-,G=CATTAAAAAGAAA | 7          |
| rs11704205       | NM_002745.4:c.610-2156A>G                       | 4/8        | (T/C)                 | 0.383 | 14128            | 1     | 0.994 | T=T,G=C             | 7          |
| rs13943          | NM_002745.4:c.*2337G>C                          | 3' UTR     | (C/G)                 | 0.383 | -14923           | 1     | 0.994 | T=C,G=G             | 5          |
| rs2266967        | NM_002745.4:c.492+3350G>T                       | 3/8        | (C/A)                 | 0.383 | 25664            | 1     | 0.994 | T=C,G=A             | 5          |
| rs4478016        | NM_002745.4:c.609+4570A>G                       | 4/8        | (T/C)                 | 0.383 | 17606            | 1     | 0.994 | T=T,G=C             | 7          |
| rs5749806        | intergenic                                      | intergenic | (C/A)                 | 0.383 | -24507           | 1     | 0.994 | T=C,G=A             | 5          |
| rs5749986        | NM_002745.4:c.492+2478A>G                       | 3/8        | (T/C)                 | 0.383 | 26536            | 1     | 0.994 | T=T,G=C             | 5          |
| <b>rs5999521</b> | NM_002745.4:c.610-3302T>C                       | 4/8        | (A/G)                 | 0.383 | 15274            | 1     | 0.994 | T=A,G=G             | <b>2b</b>  |
| rs5999550        | NM_002745.4:c.609+2015G>C                       | 4/8        | (C/G)                 | 0.383 | 20161            | 1     | 0.994 | T=C,G=G             | 4          |
| rs8136590        | NM_002745.4:c.609+4158A>G                       | 4/8        | (T/C)                 | 0.383 | 18018            | 1     | 0.994 | T=T,G=C             | 7          |
| rs3810609        | downstream                                      | downstream | (C/T)                 | 0.385 | -18323           | 0.994 | 0.988 | T=C,G=T             | 4          |
| rs3810610        | NM_002745.4:c.*3041A>G                          | 3' UTR     | (T/C)                 | 0.385 | -15627           | 0.994 | 0.988 | T=T,G=C             | 4          |
| rs1892846        | NM_002745.4:c.120-24344T>G                      | 1/8        | (A/C)                 | 0.382 | 55354            | 1     | 0.988 | T=A,G=C             | 5          |
| rs1892848        | NM_002745.4:c.120-24427A>G                      | 1/8        | (T/C)                 | 0.382 | 55437            | 1     | 0.988 | T=T,G=C             | 5          |
| rs2283794        | NM_002745.4:c.119+9142A>T                       | 1/8        | (T/C)                 | 0.382 | 81344            | 1     | 0.988 | T=T,G=C             | 4          |
| rs5749937        | NM_002745.4:c.856+2410G>A                       | 6/8        | (C/T)                 | 0.382 | 9011             | 1     | 0.988 | T=C,G=T             | 6          |
| rs5999750        | NM_002745.4:c.120-25874A>G                      | 1/8        | (T/C)                 | 0.382 | 56884            | 1     | 0.988 | T=T,G=C             | 6          |
| rs5999823        | NM_002745.4:c.119+10735G>T                      | 1/8        | (C/A)                 | 0.382 | 79751            | 1     | 0.988 | T=C,G=A             | 6          |
| rs6518986        | NM_002745.4:c.120-23212A>G                      | 1/8        | (T/C)                 | 0.382 | 54222            | 1     | 0.988 | T=T,G=C             | 5          |
| rs5750113        | NM_002745.4:c.119+1538G>A                       | 1/8        | (C/T)                 | 0.38  | 88949            | 1     | 0.982 | T=C,G=T             | 4          |
| rs5999515        | NM_002745.4:c.610-2004A>G                       | 4/8        | (T/C)                 | 0.378 | 13976            | 1     | 0.97  | T=T,G=C             | 6          |

|                  |                                      |            |          |       |        |       |       |            |           |
|------------------|--------------------------------------|------------|----------|-------|--------|-------|-------|------------|-----------|
| rs8141851        | NM_002745.4:c.120-4315T>C            | 1/8        | (A/G)    | 0.378 | 35325  | 1     | 0.97  | T=A,G=G    | 5         |
| rs8136867        | NM_002745.4:c.119+16818C>T           | 1/8        | (G/A)    | 0.369 | 73668  | 1     | 0.935 | T=G,G=A    | 5         |
| <b>rs5755654</b> | NM_002745.4:c.119+29134T>C           | 1/8        | (A/G)    | 0.367 | 61352  | 1     | 0.929 | T=A,G=G    | <b>3a</b> |
| rs5755099        | NM_002745.4:c.967-1431T>G            | 7/8        | (A/C)    | 0.404 | -6085  | 1     | 0.925 | T=A,G=C    | 5         |
| rs6928           | NM_002745.4:c.*3535G>C               | 3' UTR     | (C/G)    | 0.404 | -16121 | 0.994 | 0.913 | T=C,G=G    | 4         |
| rs113244990      | NM_002745.4:c.119+27940_119+27943dup | 1/8        | (-/AAAC) | 0.362 | 62542  | 1     | 0.906 | T=-,G=AAAC | 5         |
| rs11440648       | intergenic                           | intergenic | (-/T)    | 0.391 | 99755  | 0.963 | 0.905 | T=-,G=T    | 4         |
| rs9607347        | intergenic                           | intergenic | (T/C)    | 0.391 | 96323  | 0.963 | 0.905 | T=T,G=C    | 7         |
| rs5754941        | intergenic                           | intergenic | (C/G)    | 0.357 | -29130 | 0.987 | 0.866 | T=C,G=G    | 7         |
| rs743409         | NM_002745.4:c.857-1944T>C            | 6/8        | (A/G)    | 0.344 | -1910  | 1     | 0.84  | T=A,G=G    | 4         |
| <b>rs3788332</b> | NM_002745.4:c.120-9432C>T            | 1/8        | (G/A)    | 0.425 | 40442  | 0.994 | 0.835 | T=G,G=A    | <b>2b</b> |
| rs4516540        | NM_002745.4:c.120-6111T>C            | 1/8        | (A/G)    | 0.425 | 37121  | 0.994 | 0.835 | T=A,G=G    | 5         |
| rs5749998        | NM_002745.4:c.120-239T>A             | 1/8        | (A/T)    | 0.425 | 31249  | 0.994 | 0.835 | T=A,G=T    | 5         |
| rs9607287        | NM_002745.4:c.120-1290T>C            | 1/8        | (A/G)    | 0.425 | 32300  | 0.994 | 0.835 | T=A,G=G    | 7         |
| rs2006893        | NM_002745.4:c.857-1407C>T            | 6/8        | (G/A)    | 0.431 | -2447  | 1     | 0.826 | T=G,G=A    | 4         |

| enhancer histone marks | promoter histone marks | DNase hypersensitive sites | ChIPseq | eQTL | polymiRST |
|------------------------|------------------------|----------------------------|---------|------|-----------|
|                        |                        |                            |         | YES  |           |
|                        |                        |                            |         | #N/A |           |
|                        |                        |                            |         | YES  |           |
|                        |                        |                            |         | YES  | X         |
|                        |                        |                            |         | YES  |           |
| 9                      | 1                      | 5                          | 14      | YES  |           |
|                        |                        |                            |         | YES  | X         |
|                        |                        |                            |         | YES  |           |
|                        |                        |                            |         | #N/A |           |
|                        |                        |                            |         | YES  |           |
|                        |                        |                            |         | YES  |           |
|                        |                        |                            |         | YES  |           |

|    |    |    |    |      |  |
|----|----|----|----|------|--|
|    |    |    |    | YES  |  |
|    |    |    |    | YES  |  |
| 14 | 0  | 0  |    | YES  |  |
|    |    |    |    | YES  |  |
|    |    |    |    | YES  |  |
|    |    |    |    | #N/A |  |
|    |    |    |    | YES  |  |
| 21 | 10 | 19 | 12 | YES  |  |
|    |    |    |    | YES  |  |



| RS_Number | HGSV                     | Intron | Alleles (Major/minor) | MAF    | Distance (bases) | D' | R2 | Correlated_Alleles | RegulomeDB |
|-----------|--------------------------|--------|-----------------------|--------|------------------|----|----|--------------------|------------|
| rs3729931 | NM_002880.3:c.1669-36C>T | 15/16  | G/A                   | 0.4683 | 0                | 1  | 1  | G=G,A=A            | 1f         |

|                        |                        |                            |              |             |
|------------------------|------------------------|----------------------------|--------------|-------------|
| enhancer histone marks | promoter histone marks | DNase hypersensitive sites |              |             |
| 3                      | 0                      | 1                          | ChIPseq<br>1 | eQTL<br>YES |
