# Supplementary material for: Polymorphisms in RAS/RAF/MEK/ERK Pathway Are Associated with Gastric Cancer
Source: MDPI journal article supplement (doi:10.3390/genes10010020), 2018-12-28
Supplement: s1 [file s1]

Table S3. Association for the allele model according to clinicopathological features.

a) Lauren's classification

| rsID       | Gene         | Minor allele | Intestinal-type OR (95% CI) | <i>p</i> -value (unadjusted) | Diffuse-type OR(95%CI) | <i>p</i> -value (unadjusted) | <i>p</i> -independence |
|------------|--------------|--------------|-----------------------------|------------------------------|------------------------|------------------------------|------------------------|
| rs3729931  | <i>RAF1</i>  | T            | 1.42 (1.06-1.90)            | 0.021                        | 1.73 (1.24-2.39)       | 0.001                        | 0.326                  |
| rs45604736 | <i>HRAS</i>  | C            | 1.63 (1.11-2.40)            | 0.013                        | 1.57 (1.06-2.32)       | 0.025                        | 0.298                  |
| rs2283792  | <i>MAPK1</i> | T            | 1.40 (1.03-1.91)            | 0.032                        | 1.48 (1.08-2.03)       | 0.014                        | 0.179                  |
| rs9610417  | <i>MAPK1</i> | T            | 0.60 (0.38-0.93)            | 0.023                        | 0.61 (0.38-0.98)       | 0.042                        | 1.000                  |

b) Tumour size

| rsID       | Gene         | Minor allele | <5cm OR (95% CI) | <i>p</i> -value (unadjusted) | >5cm OR(95% CI)  | <i>p</i> -value (unadjusted) | <i>p</i> -independence |
|------------|--------------|--------------|------------------|------------------------------|------------------|------------------------------|------------------------|
| rs3729931  | <i>RAF1</i>  | T            | 1.64 (1.19-2.26) | 0.0024                       | 1.47 (1.09-1.98) | 0.012                        | 0.75                   |
| rs45604736 | <i>HRAS</i>  | C            | 1.71 (1.16-2.51) | 0.0070                       | 1.50 (1.02-2.22) | 0.039                        | 0.51                   |
| rs2283792  | <i>MAPK1</i> | T            | 1.24 (0.90-1.70) | 0.19                         | 1.63 (1.19-2.22) | 0.0021                       | 0.20                   |
| rs9610417  | <i>MAPK1</i> | T            | 0.60 (0.37-0.95) | 0.031                        | 0.61 (0.39-0.96) | 0.032                        | 0.98                   |

c) TNM Stage

| rsID       | Gene         | Minor allele | TNM I or II OR (95% CI) | <i>p</i> -value (unadjusted) | TNM III or IV OR (95% CI) | <i>p</i> -value (unadjusted) | <i>p</i> -independence |
|------------|--------------|--------------|-------------------------|------------------------------|---------------------------|------------------------------|------------------------|
| rs3729931  | <i>RAF1</i>  | T            | 1.77 (1.23-2.55)        | 0.0021                       | 1.45 (1.09-2.59)          | 0.010                        | 0.46                   |
| rs45604736 | <i>HRAS</i>  | C            | 1.54 (1.00-2.37)        | 0.051                        | 1.64 (1.14-2.37)          | 0.0080                       | 0.13                   |
| rs2283792  | <i>MAPK1</i> | T            | 1.45 (1.01-2.08)        | 0.043                        | 1.41 (1.06-1.88)          | 0.017                        | 0.96                   |
| rs9610417  | <i>MAPK1</i> | T            | 0.52 (0.29-0.92)        | 0.024                        | 0.66 (0.44-0.98)          | 0.041                        | 0.38                   |

Minor allele is the effect allele. OR (95%CI): Odds Ratio (95% Confidence Interval). OR estimation and *p*-value are unadjusted.
