# Supplementary material for: Polymorphisms in RAS/RAF/MEK/ERK Pathway Are Associated with Gastric Cancer
Source: MDPI journal article supplement (doi:10.3390/genes10010020), 2018-12-28
Supplement: s1 [file s1]

**Table S2.** Genotype frequencies of studied SNPs among gastric cancer cases and controls.

| rsID       | Gene          | Genotype frequencies [1] |                 |              |            | <i>p</i> -value [2] | <i>p</i> -value [3] | <i>p</i> -value [4] | HWE  |
|------------|---------------|--------------------------|-----------------|--------------|------------|---------------------|---------------------|---------------------|------|
|            |               | Gastric Cancer           | Intestinal-type | Diffuse-type | Controls   |                     |                     |                     |      |
| rs10184015 | <i>SOS1</i>   | 4/50/188                 | 2/26/104        | 2/23/84      | 7/42/193   | 0.45                | 0.65                | 0.69                | 0.03 |
| rs2290159  | <i>RAF1</i>   | 19/77/145                | 10/47/75        | 9/30/69      | 12/70/159  | 0.29                | 0.18                | 0.47                | 0.22 |
| rs3729931  | <i>RAF1</i>   | 74/111/57                | 40/56/36        | 34/54/21     | 44/117/81  | 0.00                | 0.03                | 0.00                | 0.90 |
| rs73812837 | <i>RAF1</i>   | 10/54/176                | 4/35/92         | 6/19/83      | 7/48/187   | 0.56                | 0.29                | 0.43                | 0.08 |
| rs10228436 | <i>EGFR</i>   | 41/116/84                | 17/61/53        | 24/54/31     | 43/121/77  | 0.80                | 0.20                | 0.61                | 0.79 |
| rs11514996 | <i>EGFR</i>   | 38/115/86                | 20/63/47        | 18/52/38     | 52/123/67  | 0.09                | 0.16                | 0.32                | 0.80 |
| rs11770506 | <i>EGFR</i>   | 5/51/185                 | 2/25/104        | 3/26/80      | 6/53/183   | 0.94                | 0.73                | 0.86                | 0.40 |
| rs17172438 | <i>EGFR</i>   | 32/113/95                | 13/61/57        | 19/51/38     | 41/109/92  | 0.55                | 0.16                | 0.87                | 0.42 |
| rs2740761  | <i>EGFR</i>   | 10/74/157                | 4/34/93         | 6/40/63      | 17/75/150  | 0.38                | 0.13                | 0.55                | 0.10 |
| rs6593201  | <i>EGFR</i>   | 5/61/175                 | 3/29/99         | 2/31/76      | 4/79/159   | 0.19                | 0.08                | 0.71                | 0.13 |
| rs712829   | <i>EGFR</i>   | 23/85/125                | 11/43/72        | 12/41/53     | 14/80/142  | 0.19                | 0.58                | 0.10                | 0.58 |
| rs7795743  | <i>EGFR</i>   | 24/115/101               | 13/60/58        | 11/55/42     | 25/119/98  | 0.95                | 0.78                | 0.97                | 0.26 |
| rs45604736 | <i>HRAS</i>   | 11/87/141                | 4/52/75         | 7/35/65      | 8/59/175   | 0.01                | 0.01                | 0.07                | 0.32 |
| rs9266     | <i>KRAS</i>   | 55/119/67                | 28/70/34        | 27/49/32     | 69/110/63  | 0.36                | 0.26                | 0.72                | 0.16 |
| rs1347069  | <i>MAP2K1</i> | 22/100/119               | 16/60/56        | 6/39/63      | 29/106/106 | 0.39                | 0.96                | 0.03                | 0.77 |
| rs62010232 | <i>MAP2K1</i> | 8/46/183                 | 4/22/103        | 4/24/79      | 6/38/186   | 0.64                | 0.91                | 0.31                | 0.03 |
| rs959260   | <i>GRB2</i>   | 10/51/181                | 4/26/102        | 6/24/79      | 4/57/180   | 0.24                | 0.50                | 0.16                | 1.00 |
| rs1823059  | <i>MAP2K2</i> | 8/85/148                 | 4/48/80         | 4/37/67      | 7/83/152   | 0.92                | 0.93                | 0.90                | 0.32 |
| rs350912   | <i>MAP2K2</i> | 11/78/150                | 7/40/83         | 4/37/67      | 8/85/149   | 0.67                | 0.46                | 1.00                | 0.44 |
| rs2283792  | <i>MAPK1</i>  | 54/125/62                | 25/75/32        | 29/49/30     | 40/110/92  | 0.01                | 0.02                | 0.05                | 0.19 |
| rs4821401  | <i>MAPK1</i>  | 5/53/183                 | 2/30/100        | 3/22/83      | 5/72/165   | 0.14                | 0.28                | 0.20                | 0.49 |
| rs743409   | <i>MAPK1</i>  | 35/120/86                | 18/66/48        | 17/53/38     | 25/109/107 | 0.11                | 0.28                | 0.17                | 0.77 |
| rs9340     | <i>MAPK1</i>  | 24/115/103               | 13/63/56        | 11/52/46     | 38/114/90  | 0.13                | 0.26                | 0.35                | 0.89 |
| rs9610417  | <i>MAPK1</i>  | 4/52/180                 | 2/29/99         | 2/23/80      | 6/79/153   | 0.01                | 0.06                | 0.08                | 0.40 |
| rs10066011 | <i>PDGFRB</i> | 6/60/175                 | 3/32/96         | 3/28/78      | 4/62/176   | 0.85                | 0.86                | 0.84                | 0.80 |
| rs1017375  | <i>PDGFRB</i> | 7/53/181                 | 5/33/93         | 2/20/87      | 6/53/183   | 0.98                | 0.52                | 0.73                | 0.40 |
| rs58746386 | <i>PDGFRB</i> | 11/66/164                | 4/37/90         | 7/29/73      | 4/80/158   | 0.10                | 0.44                | 0.04                | 0.13 |

[1] aa/Aa/AA, being A the mayor allele and a the minor allele. [2] Gastric cancer versus controls, Fisher's exact test of independence.

[3] Intestinal-type versus controls, Fisher's exact test of independence. [4] Diffuse-type versus controls, Fisher's exact test of independence.

HWE: Exact test *p*-value for departures from Hardy-Weinberg Equilibrium.
