# Supplementary material for: Polymorphisms in RAS/RAF/MEK/ERK Pathway Are Associated with Gastric Cancer
Source: MDPI journal article supplement (doi:10.3390/genes10010020), 2018-12-28
Supplement: s1 [file s1]

**Table S1.** Description of the 27 SNPs analyzed in this study.

| rsID       | Gene          | HGVS                          | [1] | [2] | Allele frequency [3] |      |      |      |      | [4]  |
|------------|---------------|-------------------------------|-----|-----|----------------------|------|------|------|------|------|
|            |               |                               |     |     | AFR                  | AMR  | EAS  | EUR  | SAS  |      |
| rs10184015 | <i>SOS1</i>   | NM_005633.3:c.1859-1142T>C    | G/A | A   | 0.57                 | 0.17 | 0.19 | 0.09 | 0.19 | 0.12 |
| rs2290159  | <i>RAF1</i>   | NM_002880.3:c.1417+170C>G     | G/C | C   | 0.32                 | 0.19 | 0.03 | 0.22 | 0.09 | 0.20 |
| rs3729931  | <i>RAF1</i>   | NM_002880.3:c.1669-36C>T      | C/T | T   | 0.65                 | 0.47 | 0.06 | 0.38 | 0.21 | 0.42 |
| rs73812837 | <i>RAF1</i>   | NM_002880.3:c.-26-2203C>T     | G/A | A   | 0.25                 | 0.13 | 0.03 | 0.11 | 0.07 | 0.13 |
| rs10228436 | <i>EGFR</i>   | NM_005228.4:c.1881-600G>A     | G/A | A   | 0.22                 | 0.39 | 0.54 | 0.35 | 0.44 | 0.43 |
| rs11514996 | <i>EGFR</i>   | NM_005228.4:c.2283+1296C>T    | C/T | T   | 0.15                 | 0.40 | 0.62 | 0.35 | 0.41 | 0.40 |
| rs11770506 | <i>EGFR</i>   | NM_005228.4:c.88+3321T>C      | T/C | C   | 0.13                 | 0.41 | 0.68 | 0.35 | 0.40 | 0.47 |
| rs17172438 | <i>EGFR</i>   | NM_005228.4:c.89-58442T>C     | T/C | C   | 0.36                 | 0.16 | 0.03 | 0.18 | 0.08 | 0.13 |
| rs2740761  | <i>EGFR</i>   | NM_005228.4:c.2470-3426C>T    | C/T | T   | 0.21                 | 0.18 | 0.08 | 0.23 | 0.09 | 0.23 |
| rs6593201  | <i>EGFR</i>   | NM_005228.4:c.88+37628A>G     | A/G | G   | 0.91                 | 0.89 | 0.98 | 0.81 | 0.83 | 0.18 |
| rs712829   | <i>EGFR</i>   | NM_005228.4:c.-216G>T         | G/T | T   | 0.25                 | 0.21 | 0.06 | 0.31 | 0.30 | 0.23 |
| rs7795743  | <i>EGFR</i>   | NM_005228.4:c.2469+959G>A     | A/G | G   | 0.57                 | 0.57 | 0.18 | 0.61 | 0.45 | 0.35 |
| rs45604736 | <i>HRAS</i>   | NM_001130442.2:c.-1115T>C     | T/C | C   | 0.00                 | 0.12 | 0.15 | 0.03 | 0.04 | 0.16 |
| rs9266     | <i>KRAS</i>   | NM_033360.3:c.*633T>C         | C/T | T   | 0.28                 | 0.51 | 0.82 | 0.52 | 0.69 | 0.51 |
| rs1347069  | <i>MAP2K1</i> | NM_002755.3:c.81-996C>T       | G/A | A   | 0.07                 | 0.28 | 0.13 | 0.25 | 0.21 | 0.34 |
| rs62010232 | <i>MAP2K1</i> | NM_002755.3:c.569-16806A>G    | G/A | A   | 0.05                 | 0.12 | 0.06 | 0.13 | 0.07 | 0.11 |
| rs959260   | <i>GRB2</i>   | NM_002086.4:c.78+20210G>A     | T/C | C   | 0.83                 | 0.26 | 0.11 | 0.17 | 0.25 | 0.13 |
| rs350912   | <i>MAP2K2</i> | NM_030662.3:c.919+423T>C      | C/T | T   | 0.15                 | 0.16 | 0.08 | 0.30 | 0.31 | 0.21 |
| rs1823059  | <i>MAP2K2</i> | NM_030662.3:c.303+1424C>T     | C/T | T   | 0.07                 | 0.24 | 0.26 | 0.23 | 0.31 | 0.20 |
| rs2283792  | <i>MAPK1</i>  | NM_002745.4:c.857-3854A>C     | G/T | T   | 0.36                 | 0.38 | 0.56 | 0.48 | 0.54 | 0.39 |
| rs4821401  | <i>MAPK1</i>  | NM_002745.4:c.119+7040A>G     | T/C | C   | 0.00                 | 0.17 | 0.21 | 0.03 | 0.12 | 0.17 |
| rs743409   | <i>MAPK1</i>  | NM_002745.4:c.857-1944T>C     | C/T | T   | 0.36                 | 0.34 | 0.54 | 0.48 | 0.49 | 0.33 |
| rs9340     | <i>MAPK1</i>  | NM_002745.4:c.*3186C>T        | C/T | T   | 0.35                 | 0.38 | 0.20 | 0.44 | 0.31 | 0.39 |
| rs9610417  | <i>MAPK1</i>  | NM_002745.4:c.119+21642G>A    | C/T | T   | 0.08                 | 0.18 | 0.09 | 0.25 | 0.10 | 0.19 |
| rs1017375  | <i>PDGFRB</i> | NM_001355016.1:c.*805C>T      | G/A | A   | 0.22                 | 0.11 | 0.01 | 0.05 | 0.06 | 0.14 |
| rs10066011 | <i>PDGFRB</i> | NM_001355016.1:c.-152-8335A>G | T/C | C   | 0.17                 | 0.14 | 0.26 | 0.1  | 0.21 | 0.15 |
| rs58746386 | <i>PDGFRB</i> | NM_001355016.1:c.-153+4691A>G | T/C | C   | 0.16                 | 0.17 | 0.13 | 0.2  | 0.12 | 0.18 |

HSVG: Human Genome Variation Society nomenclature, [1] mayor allele/minor allele defined according to GRCh37 human genome assembly, [2] assessed allele, [3] data from 1000 genomes phase 3, [4] allele frequency in controls, present study.
